# Supplementary material for: Effects of Ultrasound Modification with Different Frequency Modes on the Structure, Chain Conformation, and Immune Activity of Polysaccharides from Lentinus edodes
Source: Foods. 2022 Aug 16;11(16):2470. doi: 10.3390/foods11162470 (PMC9407330; doi:10.3390/foods11162470)
Supplement: Supplementary file 1 [file foods-11-02470-s001.zip › foods-1859533-supplementary.pdf]

**Supplementary Material for the Manuscript Entitled:**

**Effects of Ultrasound Modification with Different Frequency Modes on the  
Structure, Chain Conformation, and Immune Activity of Polysaccharides from  
*Lentinus edodes***

(A)

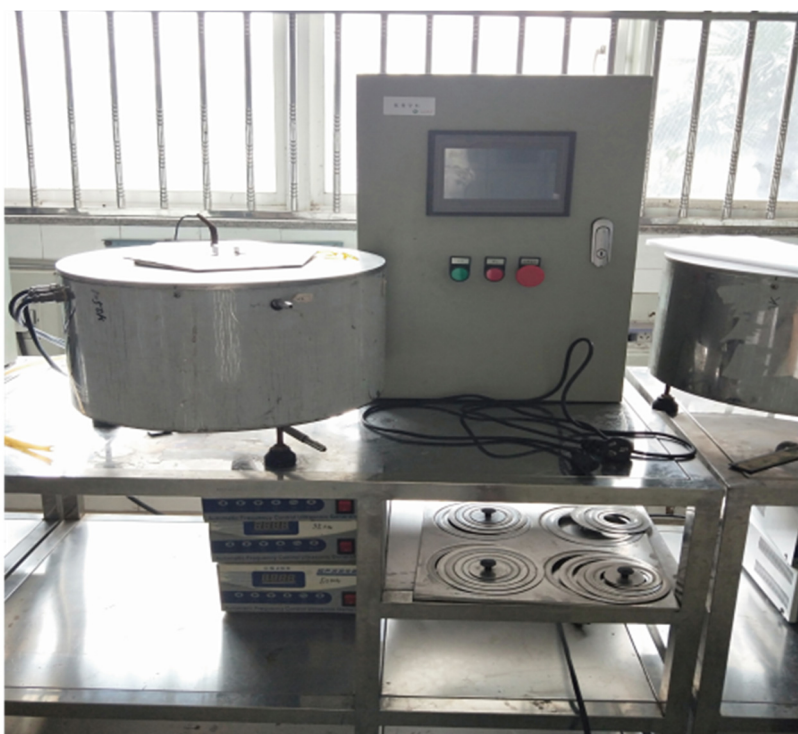

(B)

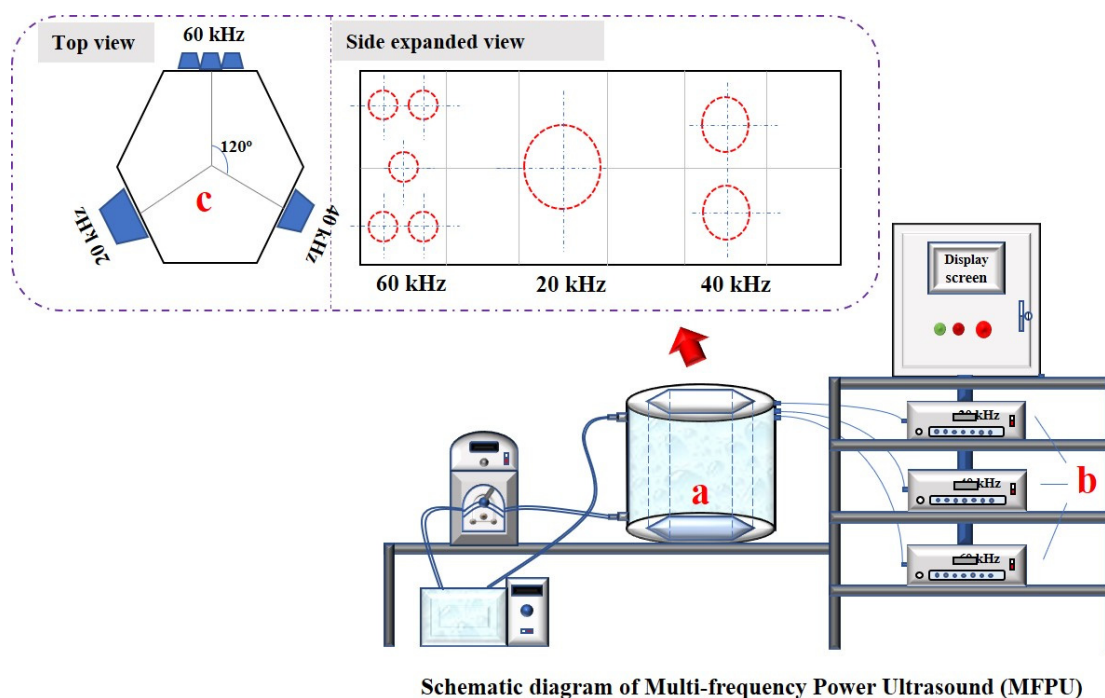

(C)

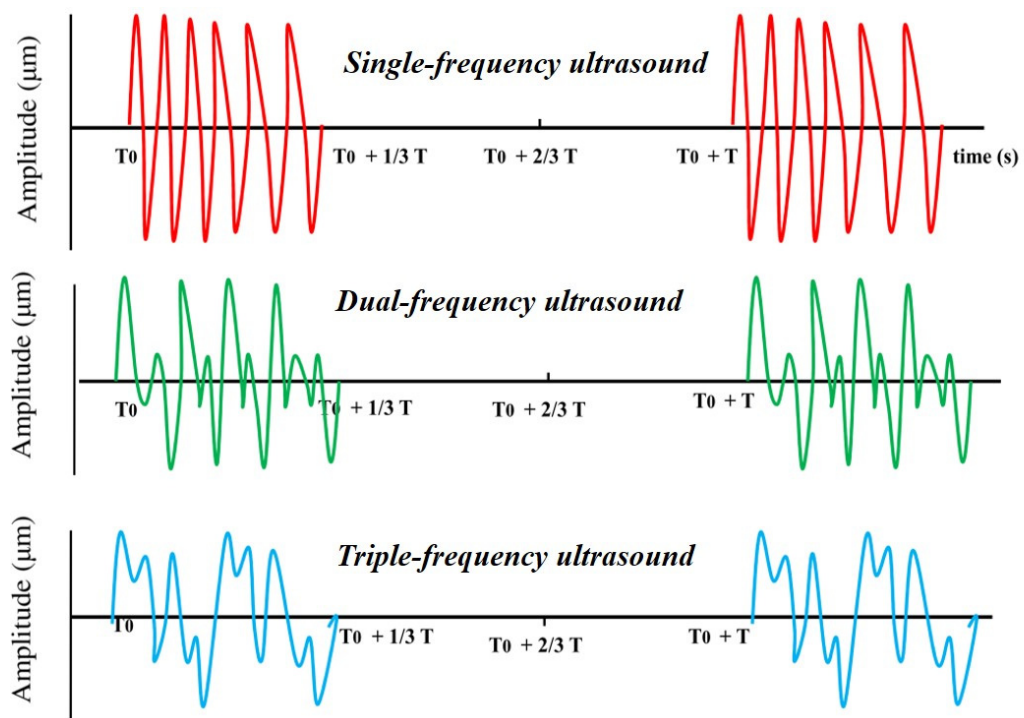

**Figure S1.** multi-frequency power ultrasound (A); Schematic diagram of the ultrasound device (a: ultrasonic transducer; b: ultrasonic generator; c: flat divergent ultrasound angle) (B); Waveform diagram of different frequency mode ultrasonic device (From  $T_0$  to  $T_0+T$  is one ultrasonic cycle) (C).
